# Supplementary material for: Isoform-Specific Role of GSK-3 in High Fat Diet Induced Obesity and Glucose Intolerance
Source: MDPI journal article supplement (doi:10.3390/cells11030559), 2022-02-05
Supplement: s1 [file s1]

## Supplementary Material

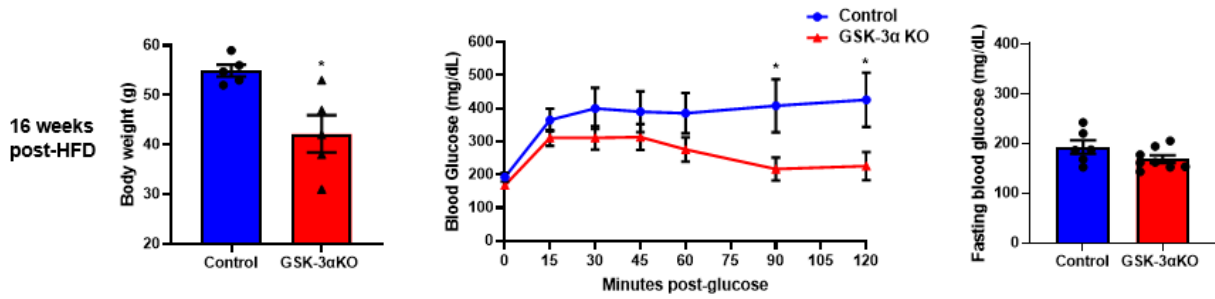

**Supplement Figure S1: Chronic conditional global GSK-3 $\alpha$  deletion protect from HFD-induced glucose intolerance :** GSK-3 $\alpha$  KO and control animals were subjected to HFD diet and were analyzed at 16 weeks post-HFD. Compared to the controls, GSK-3 $\alpha$  KO mice exhibited improved glucose clearance. (A) Body weights, (B) glucose tolerance test, (C) fasting blood glucose in GSK-3 $\alpha$  KO and control animals; \*  $p < 0.05$  WT vs KO.
